# Supplementary material
Source: publisher site journal article supplement (https://www.spandidos-publications.com/4371/downloadSupplementary)
Supplement: Supplementary file 1 [file downloadSupplementary]

## Sheet: chr3gene.short
Table SIII. The 505 chromosome 3p genes
V1	V4	V5	gene_type	gene_name
chr3	196763	409417	protein_coding	CHL1
chr3	1092658	1404217	protein_coding	CNTN6
chr3	2098813	3057959	protein_coding	CNTN4
chr3	3066324	3126613	protein_coding	IL5RA
chr3	3126933	3150879	protein_coding	TRNT1
chr3	3144628	3179727	protein_coding	CRBN
chr3	3700814	4467273	protein_coding	SUMF1
chr3	3799431	3849834	protein_coding	LRRN1
chr3	4303304	4317567	protein_coding	SETMAR
chr3	4493345	4847840	protein_coding	ITPR1
chr3	4979437	4985323	protein_coding	BHLHE40
chr3	5122249	5180911	protein_coding	ARL8B
chr3	5187646	5219958	protein_coding	EDEM1
chr3	6770001	7741533	protein_coding	GRM7
chr3	8501807	8574668	protein_coding	LMCD1
chr3	8619400	8745040	protein_coding	SSUH2
chr3	8733802	8841808	protein_coding	CAV3
chr3	8750381	8769628	protein_coding	OXTR
chr3	8775402	8963773	protein_coding	RAD18
chr3	8980591	9363053	protein_coding	SRGAP3
chr3	9362971	9386791	protein_coding	THUMPD3
chr3	9397615	9479240	protein_coding	SETD5
chr3	9498361	9553822	protein_coding	LHFPL4
chr3	9649433	9702393	protein_coding	MTMR14
chr3	9703826	9729908	protein_coding	CPNE9
chr3	9731729	9748015	protein_coding	BRPF1
chr3	9749944	9788219	protein_coding	OGG1
chr3	9757347	9769992	protein_coding	CAMK1
chr3	9779860	9793011	protein_coding	TADA3
chr3	9792495	9807101	protein_coding	ARPC4
chr3	9793082	9835401	protein_coding	ARPC4-TTLL3
chr3	9808086	9855138	protein_coding	TTLL3
chr3	9837849	9844602	protein_coding	RPUSD3
chr3	9866711	9880255	protein_coding	CIDEC
chr3	9890574	9894349	protein_coding	JAGN1
chr3	9902612	9916402	protein_coding	IL17RE
chr3	9917074	9933630	protein_coding	IL17RC
chr3	9929852	9945358	protein_coding	AC018809.3
chr3	9933816	9945406	protein_coding	CRELD1
chr3	9945542	9952408	protein_coding	PRRT3
chr3	9962537	10011116	protein_coding	EMC3
chr3	10026414	10101932	protein_coding	FANCD2
chr3	10081317	10108255	protein_coding	FANCD2OS
chr3	10115675	10127190	protein_coding	BRK1
chr3	10141778	10153667	protein_coding	VHL
chr3	10164919	10243745	protein_coding	IRAK2
chr3	10248023	10281218	protein_coding	TATDN2
chr3	10249372	10285796	protein_coding	AC022384.1
chr3	10285666	10292947	protein_coding	GHRL
chr3	10293131	10321112	protein_coding	SEC13
chr3	10324023	10708007	protein_coding	ATP2B2
chr3	10816201	10940714	protein_coding	SLC6A11
chr3	10992186	11039247	protein_coding	SLC6A1
chr3	11137093	11263557	protein_coding	HRH1
chr3	11272309	11557665	protein_coding	ATG7
chr3	11556069	11771350	protein_coding	VGLL4
chr3	11790442	11846919	protein_coding	TAMM41
chr3	12004388	12192032	protein_coding	SYN2
chr3	12153068	12158912	protein_coding	TIMP4
chr3	12287368	12434356	protein_coding	PPARG
chr3	12484421	12541549	protein_coding	TSEN2
chr3	12514934	12561059	protein_coding	MKRN2OS
chr3	12557057	12586208	protein_coding	MKRN2
chr3	12583601	12664125	protein_coding	RAF1
chr3	12733528	12769457	protein_coding	TMEM40
chr3	12796472	12871916	protein_coding	CAND2
chr3	12834485	12841582	protein_coding	RPL32
chr3	12897043	13283281	protein_coding	IQSEC1
chr3	13316235	13420322	protein_coding	NUP210
chr3	13479724	13506424	protein_coding	HDAC11
chr3	13549125	13638422	protein_coding	FBLN2
chr3	13816258	13880071	protein_coding	WNT7A
chr3	14112077	14124870	protein_coding	CHCHD4
chr3	14125015	14143680	protein_coding	TMEM43
chr3	14135217	14148252	protein_coding	AC090004.1
chr3	14145147	14178621	protein_coding	XPC
chr3	14178817	14201122	protein_coding	LSM3
chr3	14402576	14489349	protein_coding	SLC6A6
chr3	14489107	14556075	protein_coding	GRIP2
chr3	14651746	14672659	protein_coding	CCDC174
chr3	14675141	14773036	protein_coding	C3orf20
chr3	14810853	14934571	protein_coding	FGD5
chr3	14947584	15053600	protein_coding	NR2C2
chr3	15042460	15065317	protein_coding	MRPS25
chr3	15070073	15099163	protein_coding	RBSN
chr3	15206152	15252916	protein_coding	CAPN7
chr3	15254353	15341368	protein_coding	SH3BP5
chr3	15381275	15440566	protein_coding	METTL6
chr3	15427598	15450635	protein_coding	EAF1
chr3	15450133	15521751	protein_coding	COLQ
chr3	15560699	15601852	protein_coding	HACL1
chr3	15601341	15722311	protein_coding	BTD
chr3	15667236	15859771	protein_coding	ANKRD28
chr3	16174680	16231992	protein_coding	GALNT15
chr3	16257061	16264969	protein_coding	DPH3
chr3	16265160	16350299	protein_coding	OXNAD1
chr3	16313574	16514026	protein_coding	RFTN1
chr3	16586792	16670306	protein_coding	DAZL
chr3	16802651	17090604	protein_coding	PLCL2
chr3	17157162	18444817	protein_coding	TBC1D5
chr3	18345377	18445588	protein_coding	SATB1
chr3	19148510	19535642	protein_coding	KCNH8
chr3	19879472	19947025	protein_coding	EFHB
chr3	19947097	19985175	protein_coding	RAB5A
chr3	19979961	20012267	protein_coding	PP2D1
chr3	20040446	20154404	protein_coding	KAT2B
chr3	20160593	20186206	protein_coding	SGO1
chr3	21412218	22373321	protein_coding	ZNF385D
chr3	23203020	23591794	protein_coding	UBE2E2
chr3	23805955	23891640	protein_coding	UBE2E1
chr3	23889951	23946591	protein_coding	NKIRAS1
chr3	23916591	23924374	protein_coding	RPL15
chr3	23945286	23980617	protein_coding	NR1D2
chr3	24117153	24495756	protein_coding	THRB
chr3	25174332	25597932	protein_coding	RARB
chr3	25597905	25664907	protein_coding	TOP2B
chr3	25718944	25790039	protein_coding	NGLY1
chr3	25782917	25794534	protein_coding	OXSM
chr3	26622806	26717537	protein_coding	LRRC3B
chr3	27110085	27369460	protein_coding	NEK10
chr3	27372721	27484420	protein_coding	SLC4A7
chr3	27715949	27722711	protein_coding	EOMES
chr3	28241584	28325142	protein_coding	CMC1
chr3	28315003	28349050	protein_coding	AZI2
chr3	28348721	28538122	protein_coding	ZCWPW2
chr3	28349178	29767537	protein_coding	AC098650.1
chr3	28574791	30010391	protein_coding	RBMS3
chr3	30606601	30694142	protein_coding	TGFBR2
chr3	30726200	30894765	protein_coding	GADL1
chr3	31532638	31637616	protein_coding	STT3B
chr3	31657912	32077580	protein_coding	OSBPL10
chr3	31981750	31991723	protein_coding	ZNF860
chr3	32105689	32168709	protein_coding	GPD1L
chr3	32238679	32370321	protein_coding	CMTM8
chr3	32391698	32483067	protein_coding	CMTM7
chr3	32481312	32502852	protein_coding	CMTM6
chr3	32525974	32570858	protein_coding	DYNC1LI1
chr3	32685145	32773875	protein_coding	CNOT10
chr3	32817997	32897824	protein_coding	TRIM71
chr3	32951644	32956349	protein_coding	CCR4
chr3	32996609	33097202	protein_coding	GLB1
chr3	33090421	33097146	protein_coding	TMPPE
chr3	33114014	33147773	protein_coding	CRTAP
chr3	33150043	33218810	protein_coding	SUSD5
chr3	33277025	33403662	protein_coding	FBXL2
chr3	33388336	33441371	protein_coding	UBP1
chr3	33496245	33718356	protein_coding	CLASP2
chr3	33798571	33869707	protein_coding	PDCD6IP
chr3	35638945	35794496	protein_coding	ARPP21
chr3	36380503	36548007	protein_coding	STAC
chr3	36712422	36764349	protein_coding	DCLK3
chr3	36826819	36945057	protein_coding	TRANK1
chr3	36985043	36993131	protein_coding	EPM2AIP1
chr3	36993350	37050846	protein_coding	MLH1
chr3	37052626	37183689	protein_coding	LRRFIP2
chr3	37243177	37366751	protein_coding	GOLGA4
chr3	37452115	37823507	protein_coding	ITGA9
chr3	37861880	37984469	protein_coding	CTDSPL
chr3	37988059	38007188	protein_coding	VILL
chr3	38007496	38029642	protein_coding	PLCD1
chr3	38039205	38124025	protein_coding	DLEC1
chr3	38103129	38137242	protein_coding	ACAA1
chr3	38138478	38143022	protein_coding	MYD88
chr3	38165089	38255484	protein_coding	OXSR1
chr3	38265812	38278757	protein_coding	SLC22A13
chr3	38282294	38318575	protein_coding	SLC22A14
chr3	38346760	38421348	protein_coding	XYLB
chr3	38453890	38493142	protein_coding	ACVR2B
chr3	38496127	38542161	protein_coding	EXOG
chr3	38548057	38649687	protein_coding	SCN5A
chr3	38696802	38816286	protein_coding	SCN10A
chr3	38845764	39052157	protein_coding	SCN11A
chr3	39052013	39096671	protein_coding	WDR48
chr3	39096599	39107863	protein_coding	GORASP1
chr3	39107704	39138903	protein_coding	TTC21A
chr3	39141855	39154562	protein_coding	CSRNP1
chr3	39183210	39192596	protein_coding	XIRP1
chr3	39263495	39281735	protein_coding	CX3CR1
chr3	39329709	39333680	protein_coding	CCR8
chr3	39383370	39397351	protein_coding	SLC25A38
chr3	39406716	39412542	protein_coding	RPSA
chr3	39467198	39529479	protein_coding	MOBP
chr3	39808914	40260321	protein_coding	MYRIP
chr3	40309707	40312424	protein_coding	EIF1B
chr3	40387184	40428744	protein_coding	ENTPD3
chr3	40457292	40468587	protein_coding	RPL14
chr3	40477113	40491053	protein_coding	ZNF619
chr3	40477131	40518736	protein_coding	ZNF620
chr3	40524878	40574685	protein_coding	ZNF621
chr3	41194741	41260096	protein_coding	CTNNB1
chr3	41246599	41962130	protein_coding	ULK4
chr3	42013802	42225890	protein_coding	TRAK1
chr3	42257825	42266185	protein_coding	CCK
chr3	42397083	42410610	protein_coding	LYZL4
chr3	42489299	42537573	protein_coding	VIPR1
chr3	42547969	42601080	protein_coding	SEC22C
chr3	42581840	42596934	protein_coding	SS18L2
chr3	42600655	42648735	protein_coding	NKTR
chr3	42653697	42667580	protein_coding	ZBTB47
chr3	42685537	42692544	protein_coding	KLHL40
chr3	42692663	42702824	protein_coding	HHATL
chr3	42705756	42773253	protein_coding	CCDC13
chr3	42705756	42804518	protein_coding	AC006059.2
chr3	42782908	42804490	protein_coding	HIGD1A
chr3	42804752	42887974	protein_coding	ACKR2
chr3	42809446	43055871	protein_coding	AC092042.3
chr3	42809483	42942792	protein_coding	KRBOX1
chr3	42856005	42875898	protein_coding	CYP8B1
chr3	42906142	42919334	protein_coding	ZNF662
chr3	42979267	43060211	protein_coding	GASK1A
chr3	43079232	43106079	protein_coding	POMGNT2
chr3	43286512	43424764	protein_coding	SNRK
chr3	43354859	43691594	protein_coding	ANO10
chr3	43690108	43734371	protein_coding	ABHD5
chr3	44241886	44332098	protein_coding	TOPAZ1
chr3	44338119	44409451	protein_coding	TCAIM
chr3	44431705	44477670	protein_coding	ZNF445
chr3	44494847	44510636	protein_coding	ZNF852
chr3	44555193	44594173	protein_coding	ZKSCAN7
chr3	44578223	44599694	protein_coding	ZNF660
chr3	44584888	44648471	protein_coding	ZNF197
chr3	44648732	44660791	protein_coding	ZNF35
chr3	44712643	44723831	protein_coding	ZNF502
chr3	44729596	44737083	protein_coding	ZNF501
chr3	44737661	44761619	protein_coding	KIAA1143
chr3	44761721	44873376	protein_coding	KIF15
chr3	44861904	44865670	protein_coding	TMEM42
chr3	44874608	44914990	protein_coding	TGM4
chr3	44915257	44976185	protein_coding	ZDHHC3
chr3	44975241	45036066	protein_coding	EXOSC7
chr3	45001548	45036071	protein_coding	CLEC3B
chr3	45082277	45146422	protein_coding	CDCP1
chr3	45224466	45226287	protein_coding	TMEM158
chr3	45388561	45554726	protein_coding	LARS2
chr3	45555394	45686341	protein_coding	LIMD1
chr3	45689056	45745409	protein_coding	SACM1L
chr3	45755449	45796536	protein_coding	SLC6A20
chr3	45823316	45916042	protein_coding	LZTFL1
chr3	45886504	45903175	protein_coding	CCR9
chr3	45917899	45995824	protein_coding	FYCO1
chr3	45940933	45948351	protein_coding	CXCR6
chr3	46017007	46027487	protein_coding	XCR1
chr3	46163604	46266706	protein_coding	CCR3
chr3	46201711	46208313	protein_coding	CCR1
chr3	46353744	46360940	protein_coding	CCR2
chr3	46370854	46376206	protein_coding	CCR5
chr3	46407166	46412997	protein_coding	CCRL2
chr3	46435645	46485234	protein_coding	LTF
chr3	46497976	46500950	protein_coding	RTP3
chr3	46515385	46580099	protein_coding	LRRC2
chr3	46574534	46582457	protein_coding	TDGF1
chr3	46581150	46617226	protein_coding	AC104304.2
chr3	46612435	46626543	protein_coding	FAM240A
chr3	46668995	46693704	protein_coding	ALS2CL
chr3	46694528	46710886	protein_coding	TMIE
chr3	46712115	46812574	protein_coding	AC109583.1
chr3	46712117	46717869	protein_coding	PRSS50
chr3	46742092	46750891	protein_coding	PRSS45P
chr3	46835111	46882172	protein_coding	MYL3
chr3	46877721	46903799	protein_coding	PTH1R
chr3	46921726	46982010	protein_coding	CCDC12
chr3	46979666	47009704	protein_coding	NBEAL2
chr3	47016429	47164113	protein_coding	SETD2
chr3	47228395	47283451	protein_coding	KIF9
chr3	47282917	47346816	protein_coding	KLHL18
chr3	47381011	47413435	protein_coding	PTPN23
chr3	47413681	47477126	protein_coding	SCAP
chr3	47495640	47513712	protein_coding	ELP6
chr3	47562238	47580792	protein_coding	CSPG5
chr3	47585269	47782106	protein_coding	SMARCC1
chr3	47802909	47850195	protein_coding	DHX30
chr3	47850690	48089272	protein_coding	MAP4
chr3	48157146	48188417	protein_coding	CDC25A
chr3	48223347	48225491	protein_coding	CAMP
chr3	48241100	48299253	protein_coding	ZNF589
chr3	48290722	48301685	protein_coding	NME6
chr3	48306842	48328341	protein_coding	SPINK8
chr3	48372219	48401259	protein_coding	FBXW12
chr3	48403854	48430086	protein_coding	PLXNB1
chr3	48432164	48440456	protein_coding	CCDC51
chr3	48440257	48444208	protein_coding	TMA7
chr3	48446710	48467645	protein_coding	ATRIP
chr3	48465811	48467645	protein_coding	TREX1
chr3	48467798	48504826	protein_coding	SHISA5
chr3	48517684	48562015	protein_coding	PFKFB4
chr3	48561718	48563781	protein_coding	UCN2
chr3	48564073	48595329	protein_coding	COL7A1
chr3	48599002	48610976	protein_coding	UQCRC1
chr3	48620759	48621769	protein_coding	TMEM89
chr3	48625723	48635493	protein_coding	SLC26A6
chr3	48636463	48662886	protein_coding	CELSR3
chr3	48673844	48686364	protein_coding	NCKIPSD
chr3	48688003	48740353	protein_coding	IP6K2
chr3	48744597	48847874	protein_coding	PRKAR2A
chr3	48856926	48898904	protein_coding	SLC25A20
chr3	48918821	48986382	protein_coding	ARIH2
chr3	48989889	49007153	protein_coding	P4HTM
chr3	49007062	49015953	protein_coding	WDR6
chr3	49015488	49022293	protein_coding	DALRD3
chr3	49020459	49023495	protein_coding	NDUFAF3
chr3	49024325	49029447	protein_coding	IMPDH2
chr3	49029707	49094363	protein_coding	QRICH1
chr3	49095932	49105130	protein_coding	QARS1
chr3	49108046	49120938	protein_coding	USP19
chr3	49121114	49133118	protein_coding	LAMB2
chr3	49162535	49166331	protein_coding	CCDC71
chr3	49171598	49176486	protein_coding	KLHDC8B
chr3	49177634	49191858	protein_coding	C3orf84
chr3	49198428	49258106	protein_coding	IHO1
chr3	49268596	49277232	protein_coding	C3orf62
chr3	49277144	49340712	protein_coding	USP4
chr3	49357176	49358353	protein_coding	GPX1
chr3	49359139	49412998	protein_coding	RHOA
chr3	49412206	49416475	protein_coding	TCTA
chr3	49416777	49429314	protein_coding	AC104452.1
chr3	49416778	49422685	protein_coding	AMT
chr3	49422333	49429326	protein_coding	NICN1
chr3	49468703	49535618	protein_coding	DAG1
chr3	49554477	49671549	protein_coding	BSN
chr3	49674014	49683971	protein_coding	APEH
chr3	49683947	49689501	protein_coding	MST1
chr3	49689538	49721529	protein_coding	RNF123
chr3	49716829	49719684	protein_coding	AMIGO3
chr3	49716844	49723973	protein_coding	GMPPB
chr3	49724294	49786542	protein_coding	IP6K1
chr3	49790732	49799873	protein_coding	CDHR4
chr3	49803261	49805030	protein_coding	INKA1
chr3	49805209	49813953	protein_coding	UBA7
chr3	49828601	49856574	protein_coding	TRAIP
chr3	49857988	49869935	protein_coding	CAMKV
chr3	49887002	49903873	protein_coding	MST1R
chr3	49907160	49930173	protein_coding	MON1A
chr3	49940007	50100045	protein_coding	RBM6
chr3	50088919	50119021	protein_coding	RBM5
chr3	50155045	50189075	protein_coding	SEMA3F
chr3	50191610	50197696	protein_coding	GNAT1
chr3	50205246	50221486	protein_coding	SLC38A3
chr3	50226292	50259362	protein_coding	GNAI2
chr3	50267558	50277546	protein_coding	SEMA3B
chr3	50279087	50288114	protein_coding	LSMEM2
chr3	50287732	50292918	protein_coding	IFRD2
chr3	50292831	50299405	protein_coding	HYAL3
chr3	50296402	50299416	protein_coding	NAA80
chr3	50299890	50312381	protein_coding	HYAL1
chr3	50317790	50322782	protein_coding	HYAL2
chr3	50320027	50328251	protein_coding	TUSC2
chr3	50329782	50340980	protein_coding	RASSF1
chr3	50341110	50345732	protein_coding	ZMYND10
chr3	50347330	50350826	protein_coding	NPRL2
chr3	50350845	50358460	protein_coding	CYB561D2
chr3	50350892	50367923	protein_coding	Z84492.1
chr3	50354750	50359521	protein_coding	TMEM115
chr3	50362613	50504244	protein_coding	CACNA2D2
chr3	50558025	50571027	protein_coding	C3orf18
chr3	50569152	50596168	protein_coding	HEMK1
chr3	50606489	50611774	protein_coding	CISH
chr3	50611520	50649291	protein_coding	MAPKAPK3
chr3	50674927	51384198	protein_coding	DOCK3
chr3	51385291	51389397	protein_coding	MANF
chr3	51391285	51397908	protein_coding	RBM15B
chr3	51395867	51500002	protein_coding	DCAF1
chr3	51541144	51668667	protein_coding	RAD54L2
chr3	51662693	51704323	protein_coding	TEX264
chr3	51707068	51718613	protein_coding	GRM2
chr3	51778561	51779241	protein_coding	IQCF6
chr3	51798803	51833389	protein_coding	AC097636.1
chr3	51826883	51830856	protein_coding	IQCF3
chr3	51861615	51863424	protein_coding	IQCF2
chr3	51873721	51875601	protein_coding	IQCF5
chr3	51894876	51903353	protein_coding	IQCF1
chr3	51933429	51941904	protein_coding	RRP9
chr3	51942345	51948867	protein_coding	PARP3
chr3	51955381	51957499	protein_coding	GPR62
chr3	51957454	51974016	protein_coding	PCBP4
chr3	51968510	51983409	protein_coding	ABHD14B
chr3	51971426	51981199	protein_coding	ABHD14A
chr3	51974706	51989183	protein_coding	ABHD14A-ACY1
chr3	51983340	51989197	protein_coding	ACY1
chr3	51993522	51995895	protein_coding	RPL29
chr3	52048919	52056571	protein_coding	DUSP7
chr3	52075226	52154690	protein_coding	POC1A
chr3	52198086	52214327	protein_coding	ALAS1
chr3	52221080	52225645	protein_coding	TLR9
chr3	52221081	52231190	protein_coding	AC097637.1
chr3	52228612	52246788	protein_coding	TWF2
chr3	52245759	52250599	protein_coding	PPM1M
chr3	52254434	52288020	protein_coding	WDR82
chr3	52287089	52295257	protein_coding	GLYCTK
chr3	52316319	52400491	protein_coding	DNAH1
chr3	52401008	52410008	protein_coding	BAP1
chr3	52410660	52423641	protein_coding	PHF7
chr3	52433035	52445103	protein_coding	SEMA3G
chr3	52451100	52454041	protein_coding	TNNC1
chr3	52455118	52493068	protein_coding	NISCH
chr3	52495338	52524495	protein_coding	STAB1
chr3	52524385	52535054	protein_coding	NT5DC2
chr3	52534013	52579237	protein_coding	SMIM4
chr3	52545352	52685917	protein_coding	PBRM1
chr3	52681156	52694497	protein_coding	GNL3
chr3	52694486	52706032	protein_coding	GLT8D1
chr3	52704955	52711148	protein_coding	SPCS1
chr3	52708444	52770946	protein_coding	NEK4
chr3	52777595	52792068	protein_coding	ITIH1
chr3	52794768	52809009	protein_coding	ITIH3
chr3	52812962	52830688	protein_coding	ITIH4
chr3	52813282	52835729	protein_coding	AC006254.1
chr3	52833114	52835019	protein_coding	MUSTN1
chr3	52833121	52897562	protein_coding	STIMATE-MUSTN1
chr3	52836219	52897548	protein_coding	STIMATE
chr3	52903572	53046750	protein_coding	SFMBT1
chr3	52969119	53099453	protein_coding	AC096887.1
chr3	53088483	53130453	protein_coding	RFT1
chr3	53156009	53192717	protein_coding	PRKCD
chr3	53224712	53256052	protein_coding	TKT
chr3	53283429	53347586	protein_coding	DCP1A
chr3	53328963	53813733	protein_coding	CACNA1D
chr3	53812335	53846419	protein_coding	CHDH
chr3	53846568	53865794	protein_coding	IL17RB
chr3	53867066	53882152	protein_coding	ACTR8
chr3	53884417	53891962	protein_coding	SELENOK
chr3	54122547	55074557	protein_coding	CACNA2D3
chr3	54918231	54967088	protein_coding	LRTM1
chr3	55465715	55490539	protein_coding	WNT5A
chr3	55508311	56468467	protein_coding	ERC2
chr3	56557161	56621837	protein_coding	CCDC66
chr3	56620133	56683237	protein_coding	TASOR
chr3	56727418	57079329	protein_coding	ARHGEF3
chr3	57060664	57075432	protein_coding	SPATA12
chr3	57089982	57170306	protein_coding	IL17RD
chr3	57197838	57227606	protein_coding	HESX1
chr3	57227726	57278105	protein_coding	APPL1
chr3	57268342	57292685	protein_coding	ASB14
chr3	57293699	57544344	protein_coding	DNAH12
chr3	57556274	57566848	protein_coding	PDE12
chr3	57571363	57598220	protein_coding	ARF4
chr3	57625454	57693077	protein_coding	DENND6A
chr3	57755450	57930003	protein_coding	SLMAP
chr3	58008400	58172251	protein_coding	FLNB
chr3	58192257	58214697	protein_coding	DNASE1L3
chr3	58237532	58295693	protein_coding	ABHD6
chr3	58306245	58324695	protein_coding	RPP14
chr3	58306262	58320193	protein_coding	HTD2
chr3	58332880	58426127	protein_coding	PXK
chr3	58427630	58433857	protein_coding	PDHB
chr3	58492096	58502360	protein_coding	KCTD6
chr3	58505136	58537283	protein_coding	ACOX2
chr3	58564117	58627610	protein_coding	FAM107A
chr3	58633946	58666834	protein_coding	FAM3D
chr3	58717365	59050084	protein_coding	CFAP20DC
chr3	59747277	61251459	protein_coding	FHIT
chr3	61561569	62297609	protein_coding	PTPRG
chr3	62319015	62336213	protein_coding	C3orf14
chr3	62369681	62374324	protein_coding	FEZF2
chr3	62398346	62875416	protein_coding	CADPS
chr3	63228315	63616924	protein_coding	SYNPR
chr3	63652675	63679020	protein_coding	SNTN
chr3	63819299	63848636	protein_coding	C3orf49
chr3	63833870	63863868	protein_coding	THOC7
chr3	63863155	64003462	protein_coding	ATXN7
chr3	64010550	64024010	protein_coding	PSMD6
chr3	64092236	64445476	protein_coding	PRICKLE2
chr3	64515654	64688000	protein_coding	ADAMTS9
chr3	65353525	66038834	protein_coding	MAGI1
chr3	66133610	66388116	protein_coding	SLC25A26
chr3	66378797	66501263	protein_coding	LRIG1
chr3	66998307	67011210	protein_coding	KBTBD8
chr3	67360460	67654612	protein_coding	SUCLG2
chr3	68004247	68545621	protein_coding	TAFA1
chr3	68731766	68953297	protein_coding	TAFA4
chr3	68975217	69013684	protein_coding	EOGT
chr3	69019827	69052339	protein_coding	TMF1
chr3	69054730	69080408	protein_coding	UBA3
chr3	69084937	69106092	protein_coding	ARL6IP5
chr3	69106065	69123032	protein_coding	LMOD3
chr3	69168782	69542583	protein_coding	FRMD4B
chr3	69739464	69968336	protein_coding	MITF
chr3	70194479	70312638	protein_coding	MDFIC2
chr3	70954708	71583989	protein_coding	FOXP1
chr3	70959226	71754229	protein_coding	AC097634.4
chr3	71675414	71754773	protein_coding	EIF4E3
chr3	71753855	71756496	protein_coding	GPR27
chr3	71771655	71785206	protein_coding	PROK2
chr3	72371825	72446623	protein_coding	RYBP
chr3	72749277	72861914	protein_coding	SHQ1
chr3	72888046	72998138	protein_coding	GXYLT2
chr3	72996803	73069198	protein_coding	PPP4R2
chr3	73061659	73063337	protein_coding	EBLN2
chr3	73382431	73624941	protein_coding	PDZRN3
chr3	74262568	74521140	protein_coding	CNTN3
chr3	75664330	75667220	protein_coding	FRG2C
chr3	75678660	75785583	protein_coding	ZNF717
chr3	75906695	77649964	protein_coding	ROBO2
chr3	78597239	79767998	protein_coding	ROBO1
chr3	81489703	81761645	protein_coding	GBE1
chr3	84958989	86074429	protein_coding	CADM2
chr3	86876388	86991149	protein_coding	VGLL3
chr3	87227271	87255556	protein_coding	CHMP2B
chr3	87259404	87276584	protein_coding	POU1F1
chr3	87792706	87993839	protein_coding	HTR1F
chr3	88051944	88149885	protein_coding	CGGBP1
chr3	88058139	88058216	protein_coding	AC119733.1
chr3	88059255	88144660	protein_coding	ZNF654
chr3	88149959	88168729	protein_coding	C3orf38
chr3	88338416	88467594	protein_coding	CSNKA2IP
chr3	89107621	89482134	protein_coding	EPHA3
